# Supplementary material for: Vertical profiles of sediment methanogenic potential and communities in two plateau freshwater lakes
Source: Copernicus journal article supplement (doi:10.5194/bg-2016-321), 2016-08-09

## Supplementary Material

**Journal name:** Biogeosciences

**Article title:** Vertical profiles of sediment methanogenic potential and communities in two plateau freshwater lakes

**Author names:** Yuyin Yang<sup>1</sup>, Bingxin Li<sup>1</sup>, Shuguang Xie<sup>1,\*</sup>, Yong Liu<sup>2,\*</sup>

<sup>1</sup>State Key Joint Laboratory of Environmental Simulation and Pollution Control,  
College of Environmental Sciences and Engineering, Peking University, Beijing  
100871, China

<sup>2</sup>Key Laboratory of Water and Sediment Sciences (Ministry of Education), College of  
Environmental Sciences and Engineering, Peking University, Beijing 100871, China

\* Corresponding author. Tel: 86-10-62751923. Fax: 86-10-62751923.

Email: xiesg@pku.edu.cn (S Xie); yongliu@pku.edu.cn (Y Liu)

**Figure S1** Physicochemical features of sediment samples from Dianchi Lake and Erhai Lake

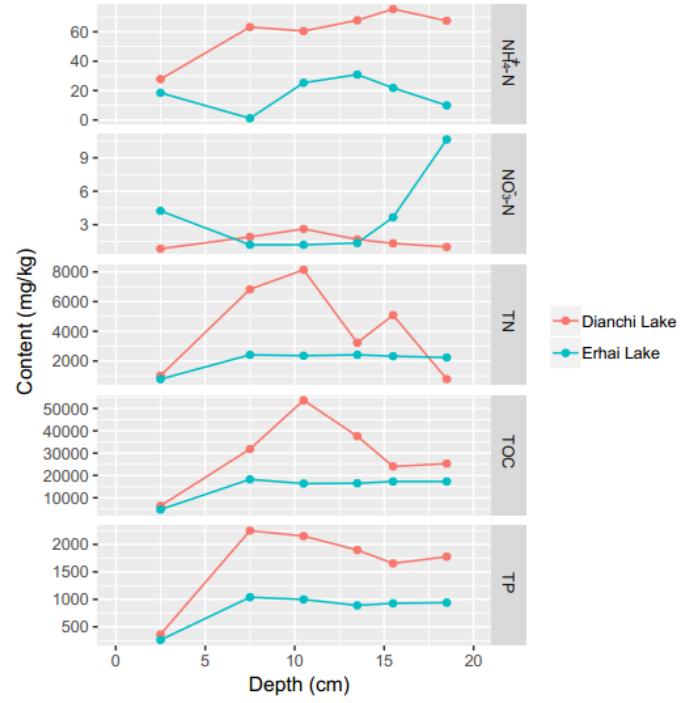

**Figure S2** Methanogen community compositions based on 16S rRNA gene. Samples D1–D6 and E1–E6 were from Dianchi Lake and Erhai Lake, respectively. Samples D1–D6 and E1–E6 were retrieved from Dianchi Lake and Erhai Lake, respectively. Digits “1” – “6” were referred to sediment depth 0–5, 5–8, 8–11, 11–14, 14–17 and 17–20 cm, respectively.

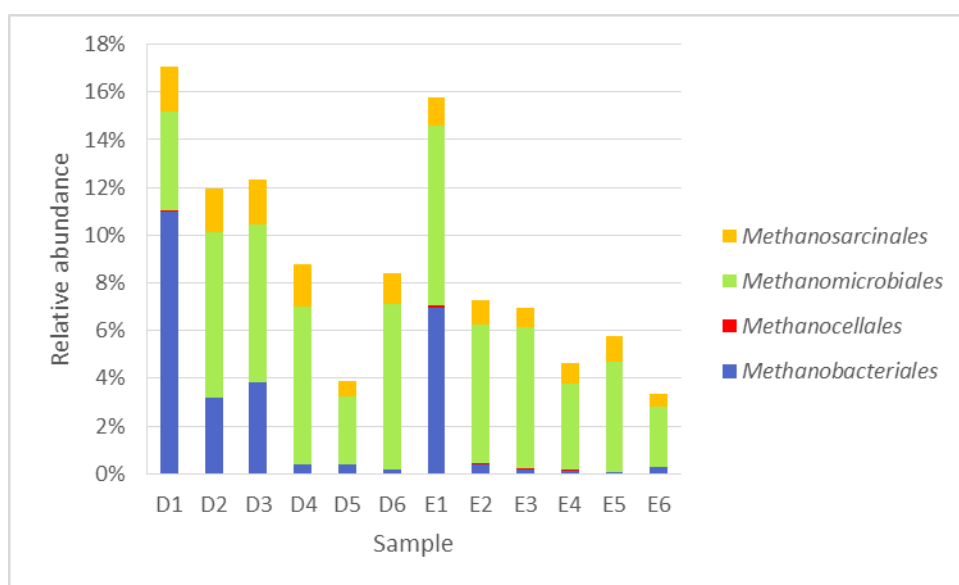

**Figure S3** Methanogen community compositions based on *mcrA* gene. Samples D1–D6 and E1–E6 were from Dianchi Lake and Erhai Lake, respectively. Samples D1–D6 and E1–E6 were retrieved from Dianchi Lake and Erhai Lake, respectively. Digits “1” – “6” were referred to sediment depth 0–5, 5–8, 8–11, 11–14, 14–17 and 17–20 cm, respectively.

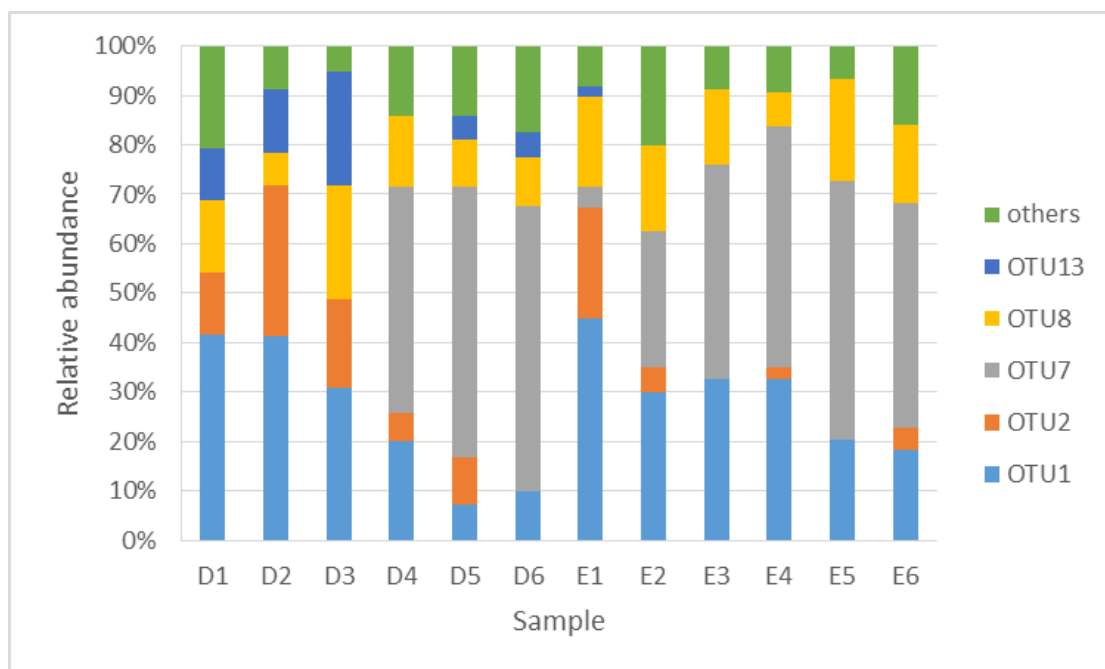

Supplement: Supplementary file 1 [file bg-2016-321-supplement.pdf]
